# Supplementary material for: Large ensemble assessment of the Arctic stratospheric polar vortex
Source: Copernicus journal article supplement (doi:10.5194/egusphere-2023-1831), 2023-08-21
Supplement: Supplementary file 1 [file egusphere-2023-1831-supplement.pdf]

# Supplement to "Large ensemble assessment of the Arctic stratospheric polar vortex"

Ales Kuchar<sup>1,\*</sup>, Maurice Öhlert<sup>1</sup>, Roland Eichinger<sup>2,3</sup>, and Christoph Jacobi<sup>1</sup>

<sup>1</sup>Leipzig Institute for Meteorology, Faculty of Physics and Earth Sciences, Leipzig University, Germany

<sup>2</sup>Deutsches Zentrum für Luft- und Raumfahrt (DLR), Institut für Physik der Atmosphäre, Oberpfaffenhofen, Germany

<sup>3</sup>Charles University Prague, Faculty of Mathematics and Physics, Department of Atmospheric Physics, Prague, Czech Republic

\*now at: University of Natural Resources and Life Sciences (BOKU), Institute of Meteorology and Climatology, Vienna, Austria

**Correspondence:** A. Kuchar (ales.kuchar@boku.ac.at)

## 1 Table of contents

- Rank Histograms for 50 hPa and 100 hPa (Figs. SS1-SS10)
- Scatter plots for displacement and split SSWs (Fig. S11 and S12)

## 2 Figures

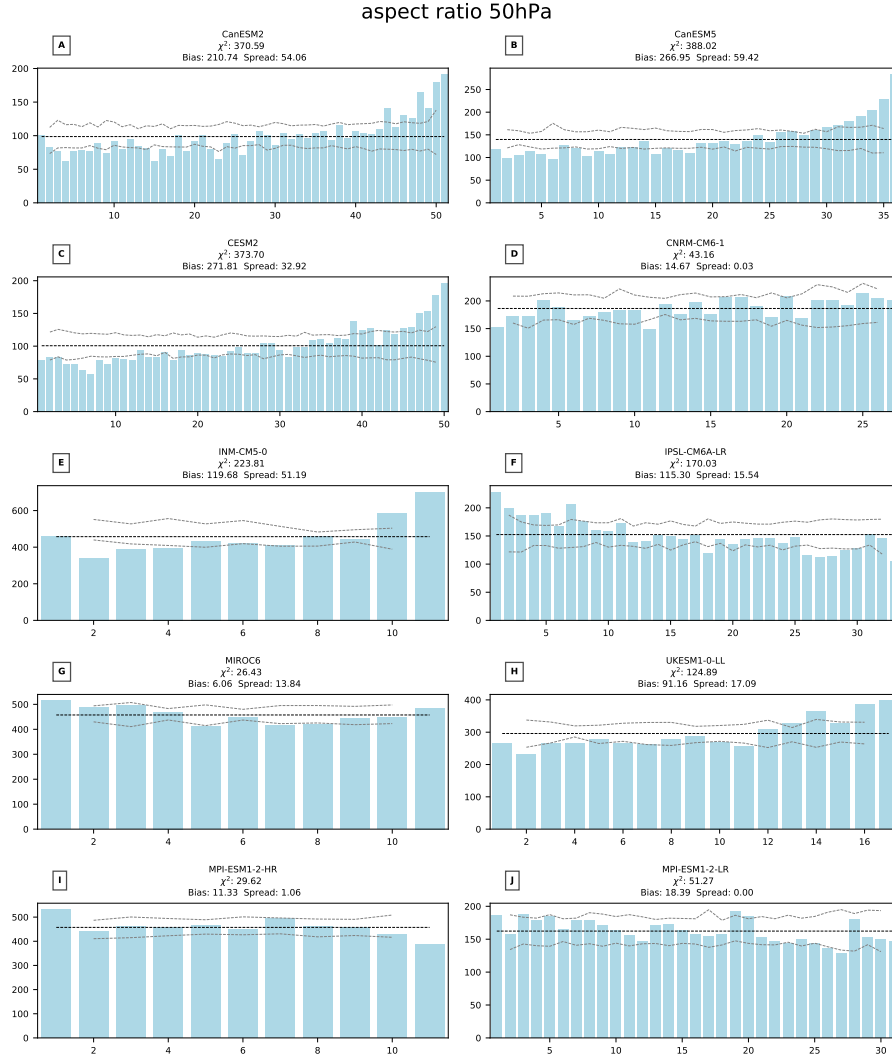

**Figure S1.** Rank histograms of aspect ratio at 50 hPa of all analyzed climate ensembles with their respective statistics. Blue bars show counts for the individual bins, black dashed line corresponds to the expected value for a flat histogram, grey dashed lines indicate the perfect model range.

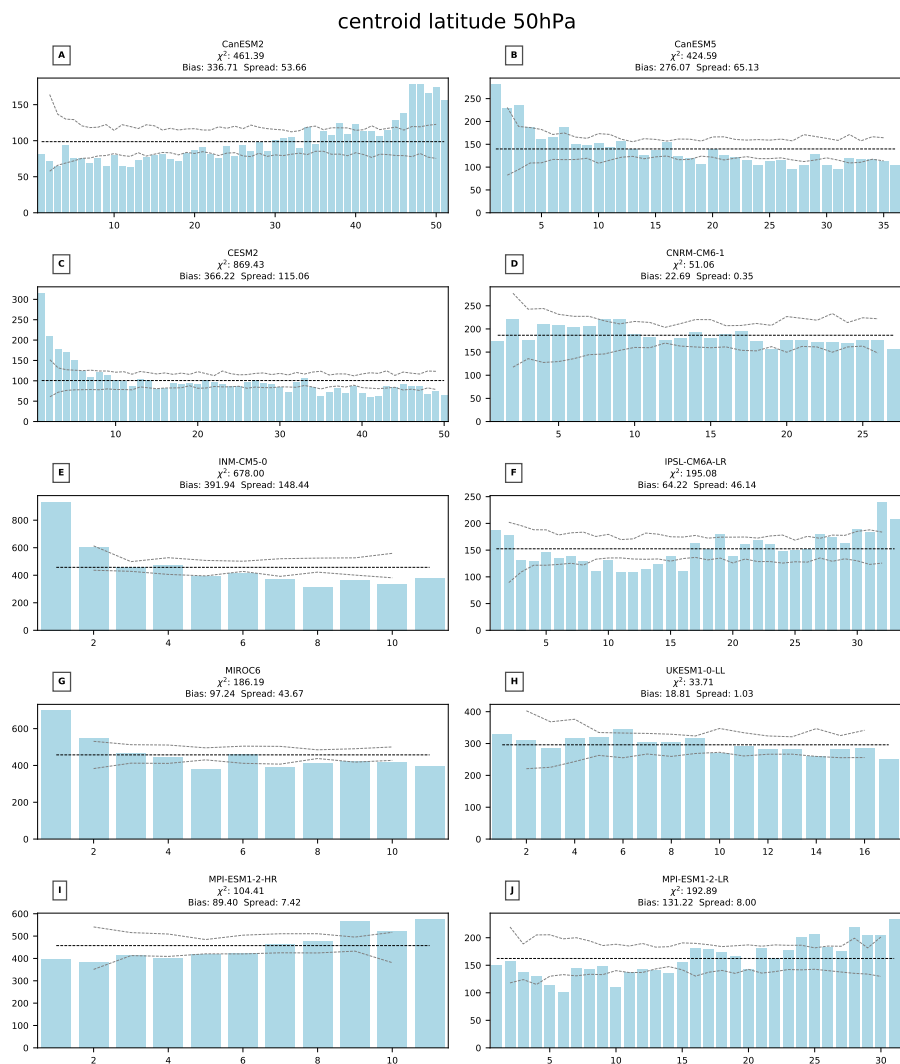

**Figure S2.** As figure S1 but for centroid latitude.

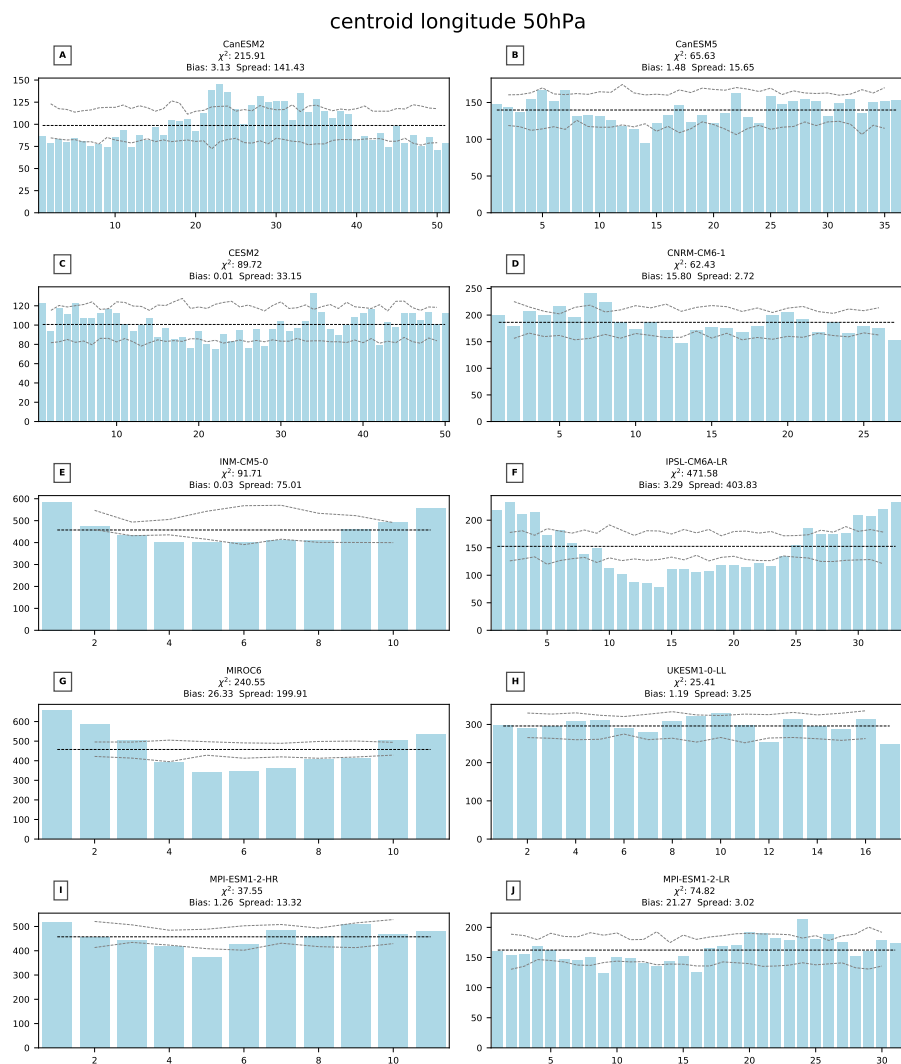

**Figure S3.** As figure S1 but for centroid longitude.

# kurtosis 50hPa

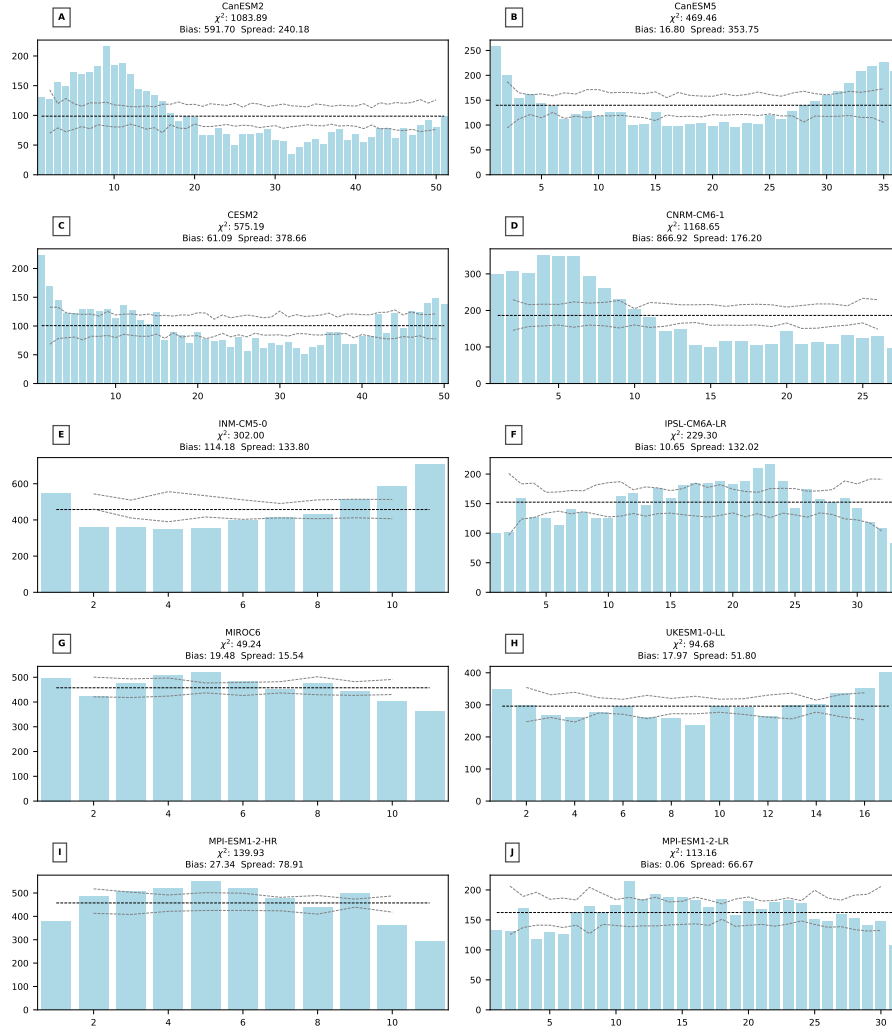

**Figure S4.** As figure S1 but for kurtosis.

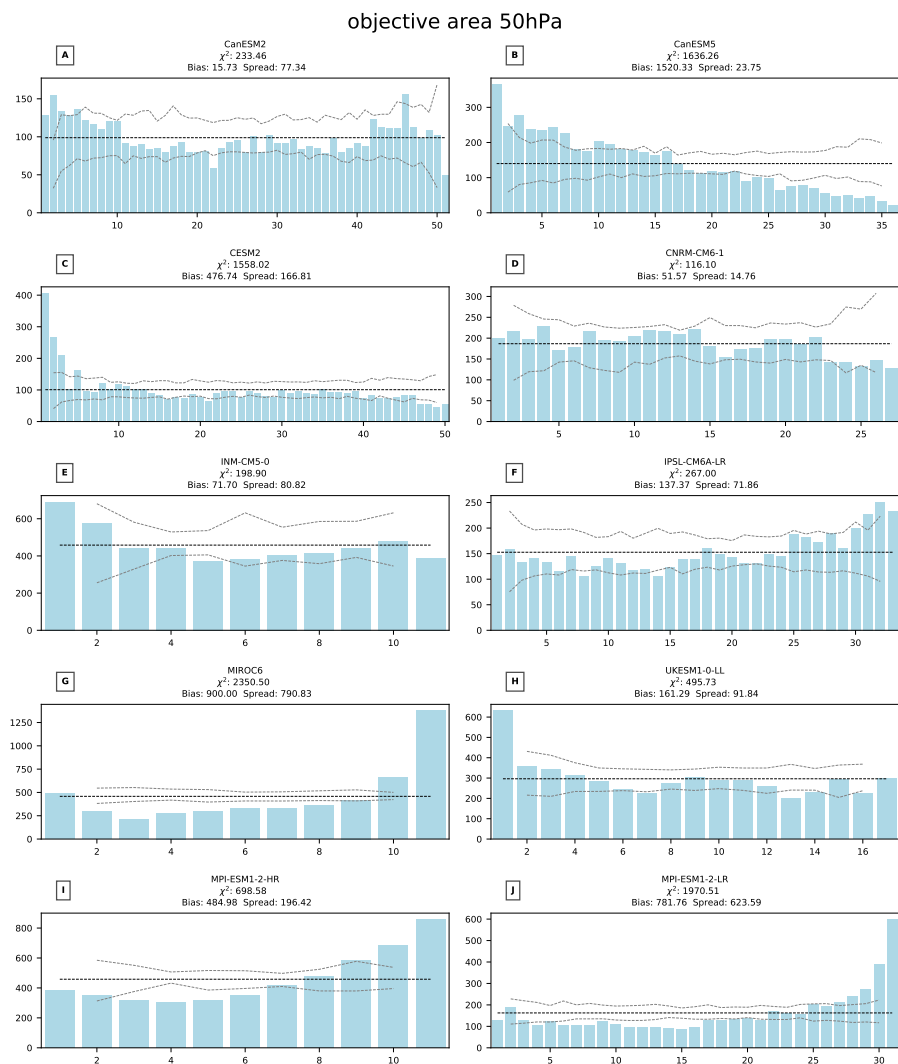

**Figure S5.** As figure S1 but for objective area.

aspect ratio 100hPa

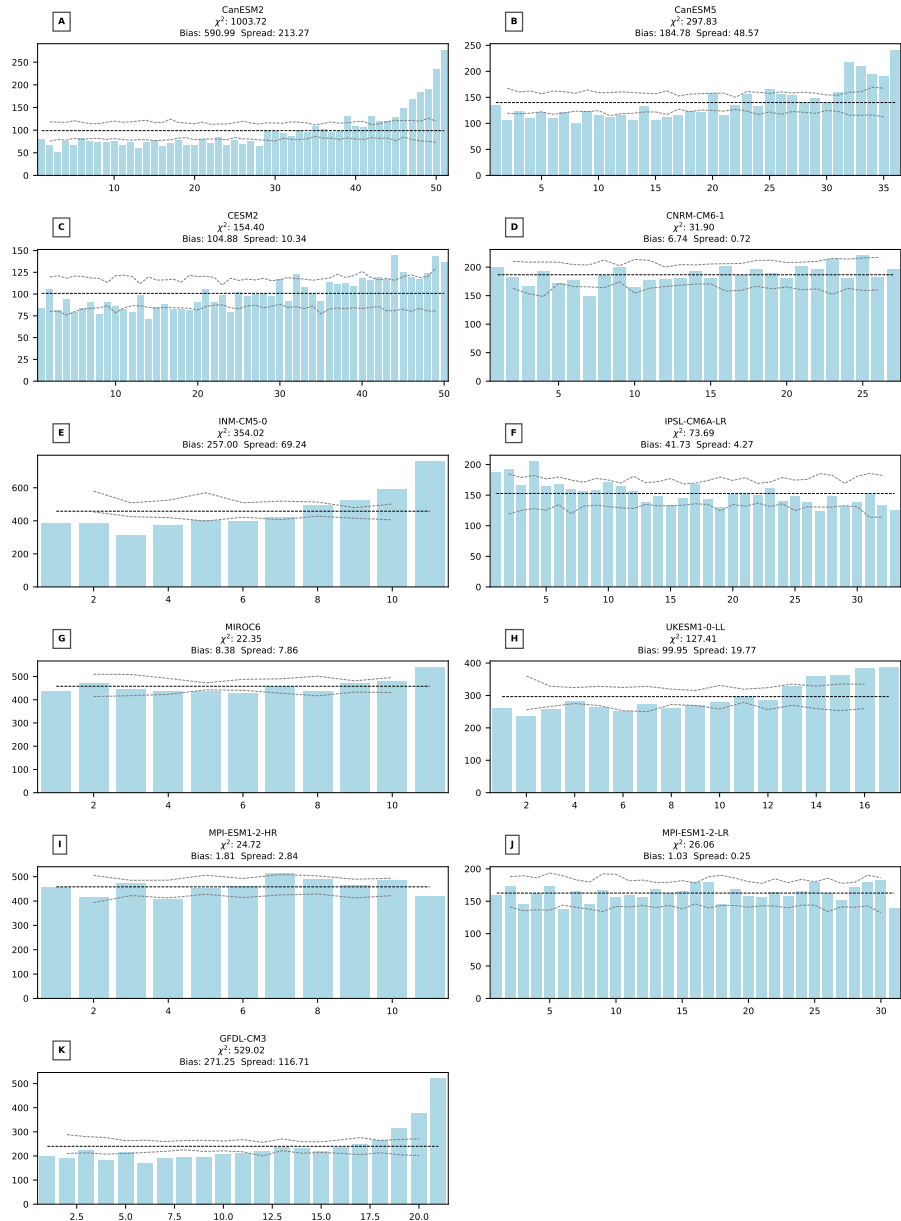

**Figure S6.** As figure S1 but for aspect ratio at 100 hPa.

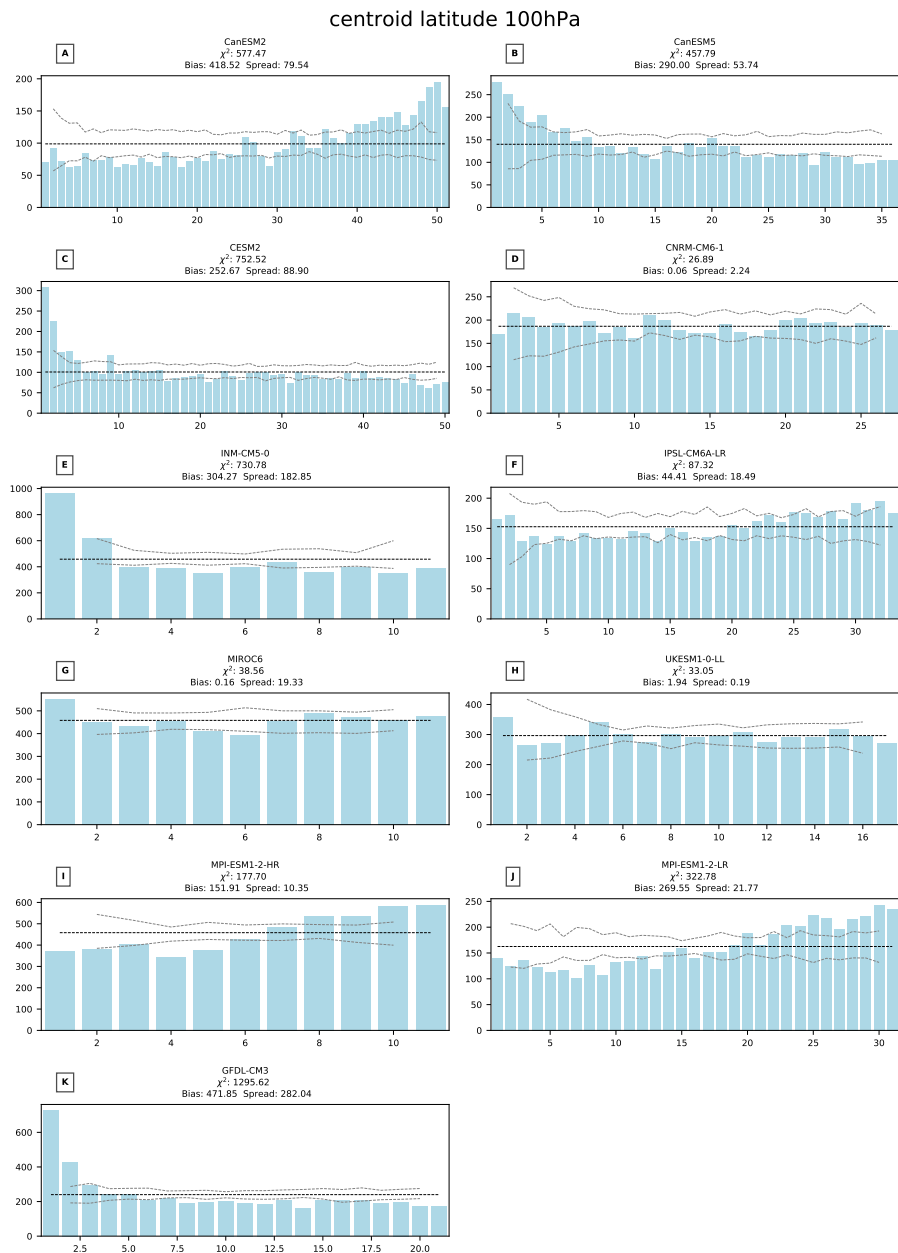

**Figure S7.** As figure S1 but for centroid latitude at 100 hPa.

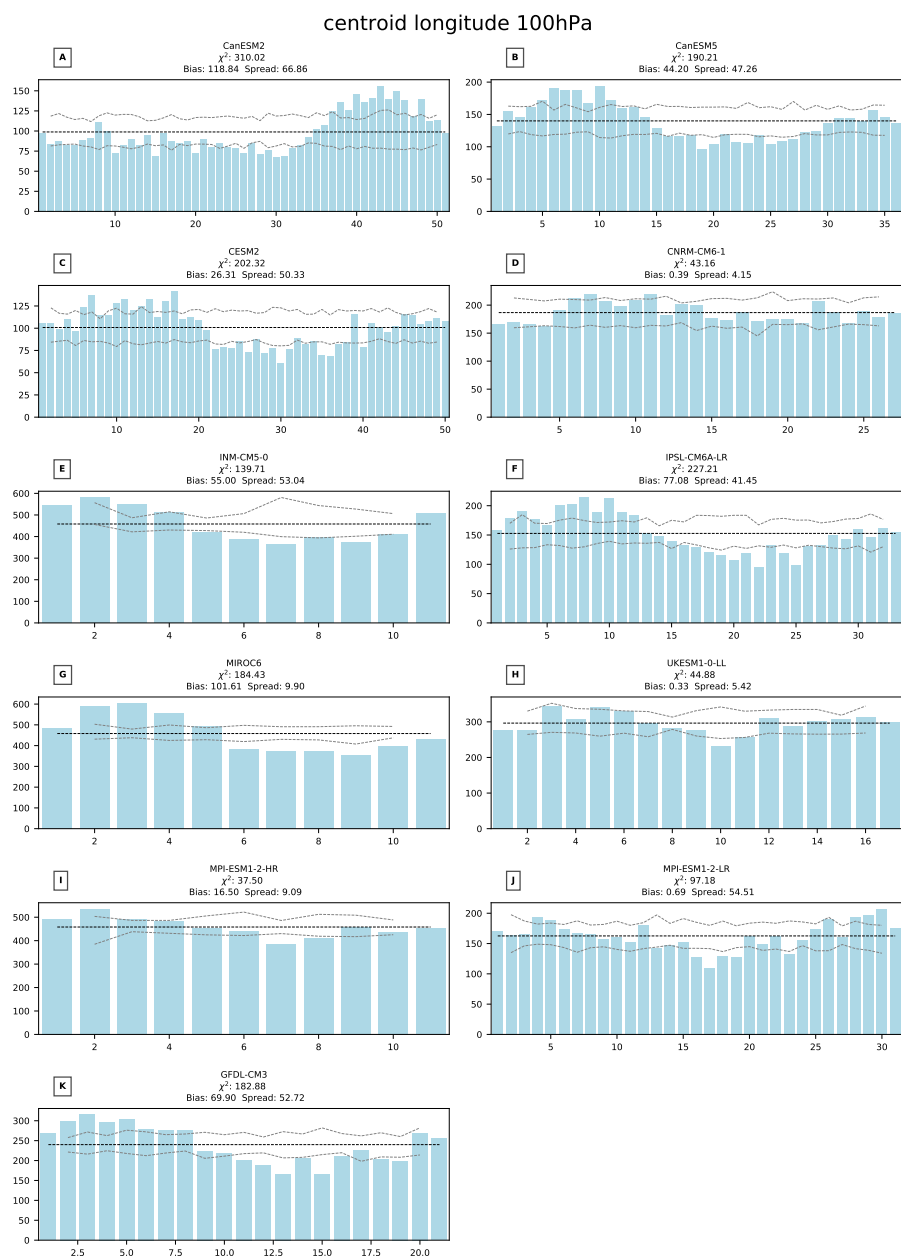

**Figure S8.** As figure S1 but for centroid longitude at 100 hPa.

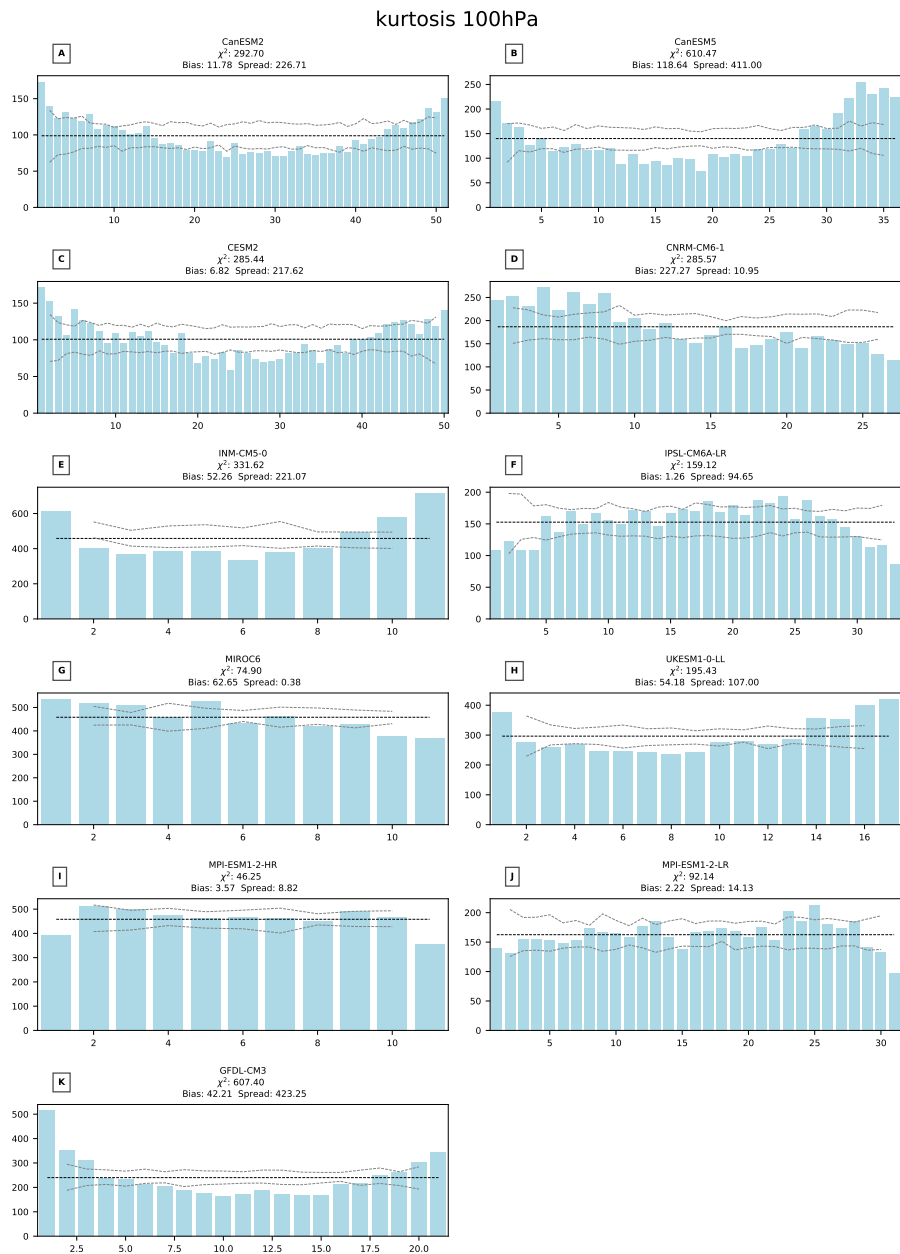

**Figure S9.** As figure S1 but for kurtosis at 100 hPa.

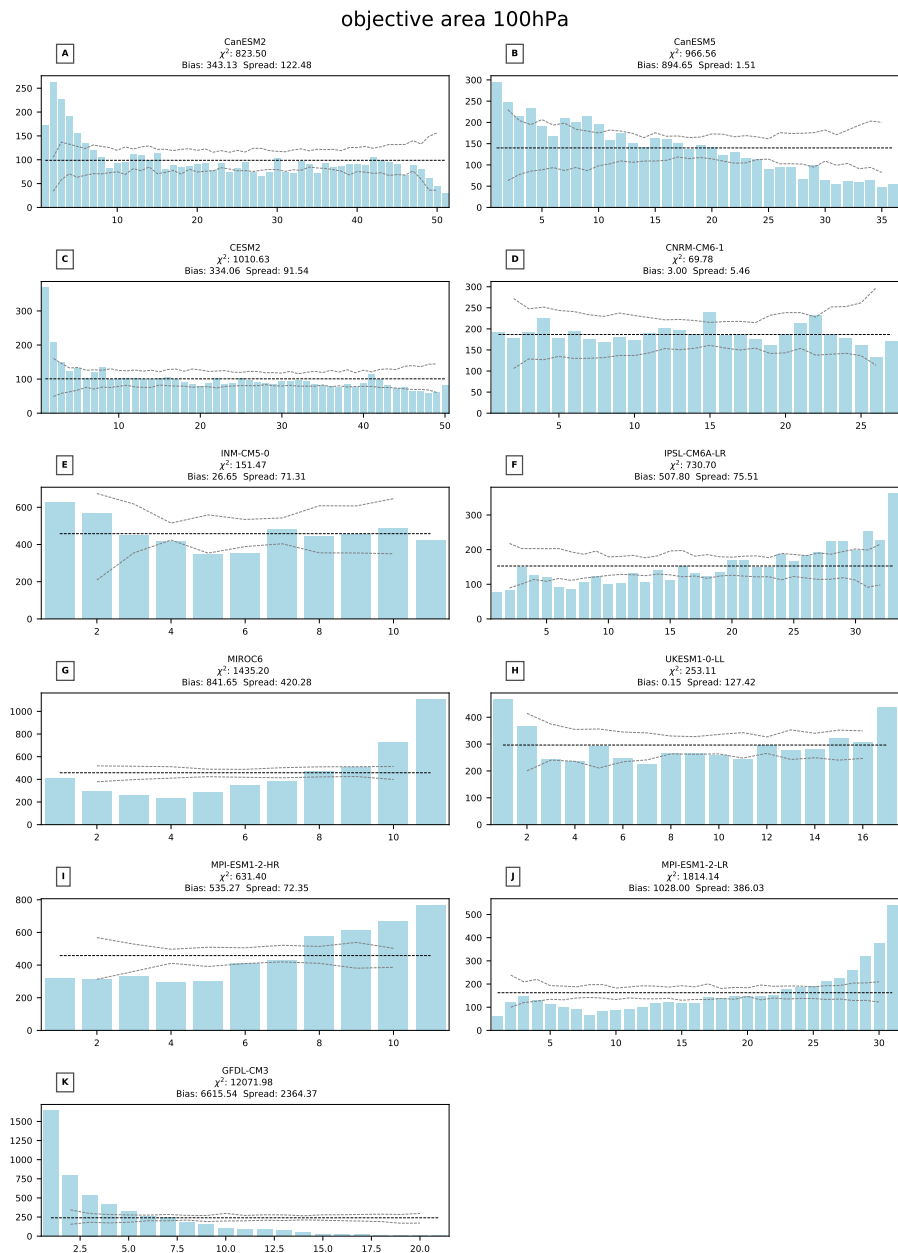

**Figure S10.** As figure S1 but for objective area at 100hPa.

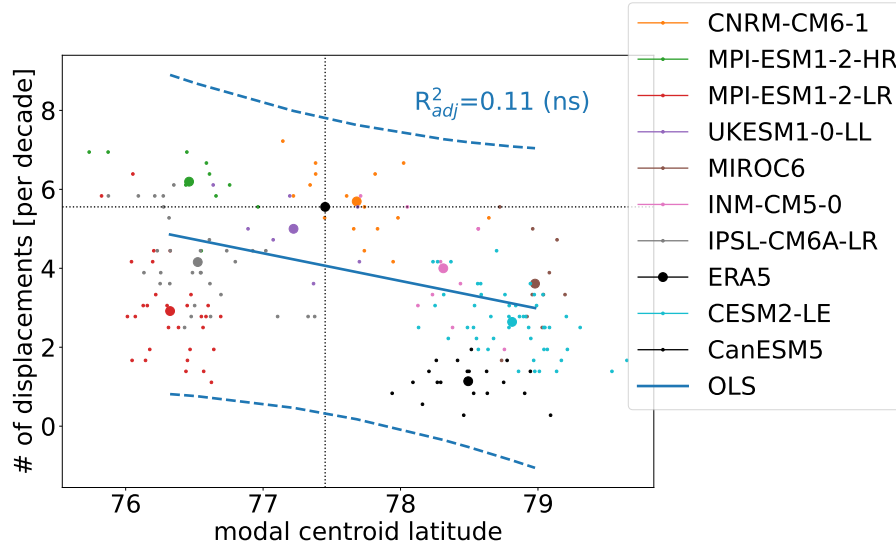

**Figure S11.** Modal DJFM centroid latitude and displacement SSWs per decade in large ensembles compared with ERA5. Solid line is ordinary least square regression for models only. Dashed lines represent results for ERA5.

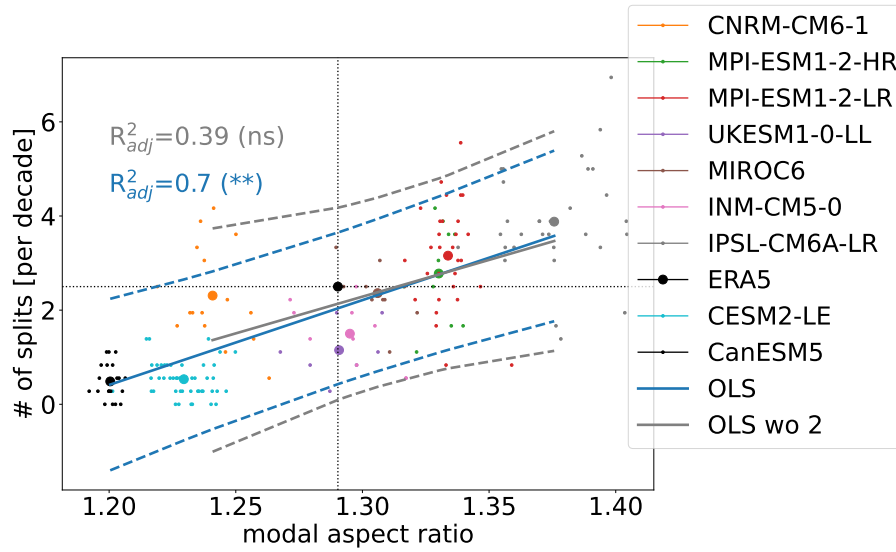

**Figure S12.** Modal DJFM aspect ratio and split SSWs per decade in large ensembles compared with ERA5. Lines are best-fit regression lines for models only. Solid blue and gray lines are ordinary least square regression for all models and high-top models only (i.e. except CESM2 and CanESM2), respectively. Dashed lines represent results for ERA5.
